# Supplementary material for: Peptide Antigen Concentration Modulates Digital NFAT1 Activation in Primary Mouse Naive CD8+ T Cells as Measured by Flow Cytometry of Isolated Cell Nuclei
Source: PubMed Central journal article supplement — Immunohorizons. Author manuscript; Available in PMC 2018 Sep 12. (PMC6135534; doi:10.4049/immunohorizons.1800032), 2018-08
Supplement: NIHMS985263-supplement-1.pdf [file NIHMS985263-supplement-1.pdf]

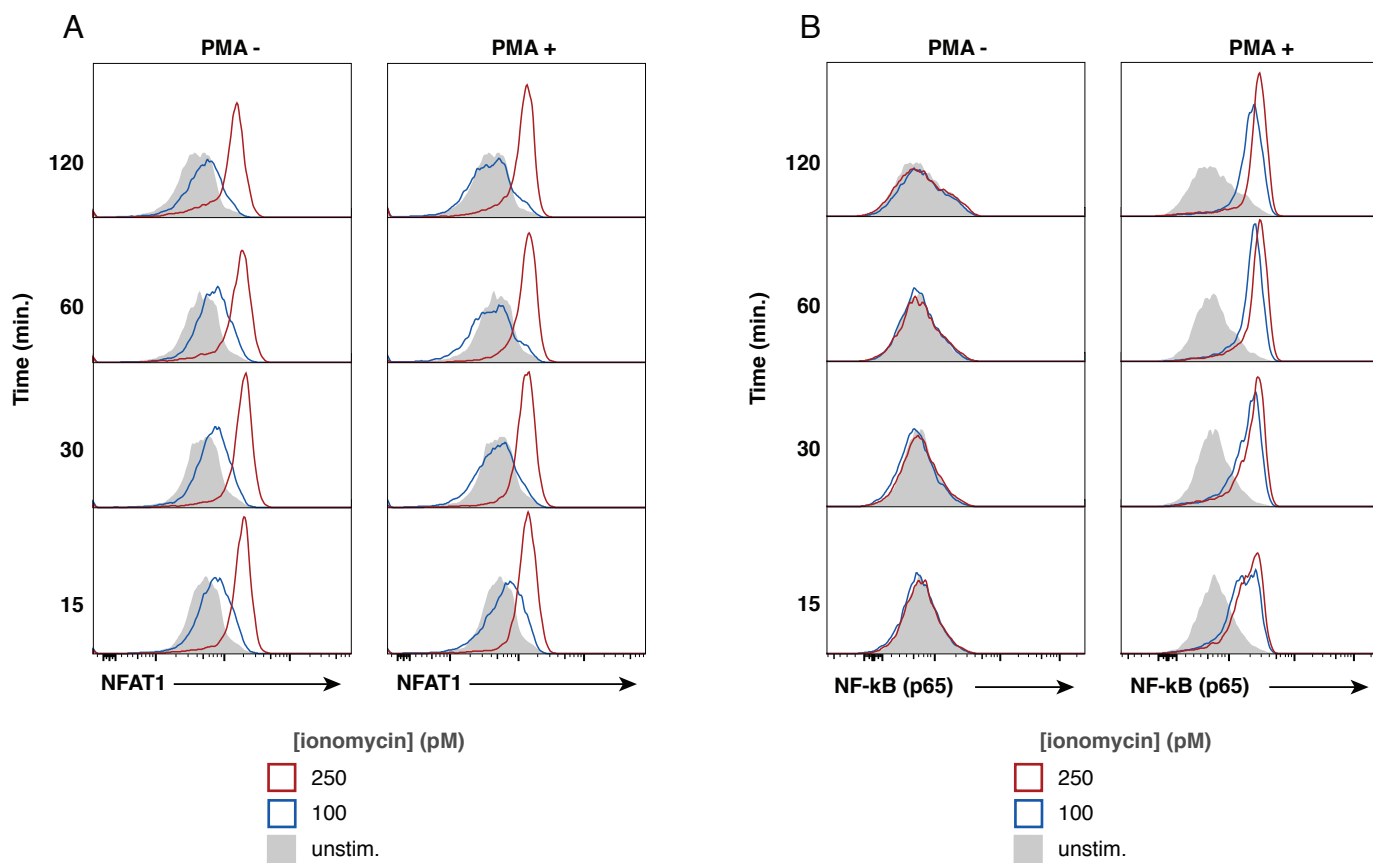

**Supplemental Figure 1.** Presence of PMA does not induce digital NFAT1 translocation. Naïve OT-I cells were stimulated with different doses of ionomycin: 250 ng/mL (red), 100 ng/mL (blue) or unstimulated (grey) with or without 10 ng/mL of PMA in culture media up to 2 hours. Isolated nuclei were stained for NFAT1 (A) or NF-κB (p65) (B).
